# Supplementary material
Source: publisher figshare collection journal article supplement (https://diabetesjournals.figshare.com/ndownloader/files/22462049)
Supplement: Supplementary file 1 [file 22462049]

**ONLINE APPENDIX**

**Longitudinal analysis of serum cytokine levels and gut microbial abundance links IL-17/IL-22 with Clostridia and insulin sensitivity in humans**

**Zhou et al.**

**Supplementary Analysis**

The goal of the iHMP study reported in the main text was to investigate the relationship between IL-17/IL-22 and the gut microbiome in individuals at risk for Type 2 Diabetes. Due to the broad scope of the iHMP additional data were collected for participants that were not the direct focus of this study. In particular, individuals self-reported information about their general health, such as periods of unusual stress, or the occurrence of an upper respiratory infection. Full details of the information collected can be found in Zhou et al. 2019 and all data are available via the iHMP DACC (https://hmpdacc.org/ihmp). In this supplementary analysis we sought to determine whether participants self-reported health influenced their serum IL-17/IL-22 levels in a manner that may influence our study of metabolic inflammation reported in the main text.

Our first objective was to determine whether serum IL-17 or IL-22 levels were associated with an individual’s health state during the time at which cytokine and microbiome data were collected. The effect of health status on individual cytokine abundance was modelled as:

*cytokine ~ Health_status + (1|subject_id) + Adj_age + gender + BMI*

Where cytokine refers to the Luminex MFI measurements for individual cytokines (IL-17A, IL-17F, IL-22). Health_status was classified as either healthy, infection (denoting a self-reported upper respiratory infection), stressed (a self-reported period of stress), or vaccination (sample collected within 14 days of influenza vccination). Adj_age was the median age of the study participant during the period over which data were collected. BMI was body mass index of the study participant.

As individuals were also sampled more intensively during periods of upper respiratory infection, we additionally sought to determine whether serum cytokine levels were associated with the stage of an infection. In this case the effect of infection on individual cytokine abundance was modelled as:

*cytokine ~ Infection_state + (1|subject_id) + Adj_age + gender + BMI*

Where Infection_state could be either pre (denoting the nearest healthy time point preceding an upper respiratory infection), early, late, post (denoting the nearest healthy time point following an infection), or healthy_other (denoting all other healthy time points). All other model terms were as described above. In both analyses, linear modelling was performed using the R package lme4, as described in the main text.

In all models neither the health status of an individual (**Supplementary Fig. 5a**), nor the stage of an upper respiratory infection (**Supplementary Fig. 5b**) had a significant effect on the abundance of serum cytokine levels. On this basis we concluded that neither health state nor infection stage exerted a strong effect on the relationship between cytokines and gut microbiota reported in the main text.

To provide an additional perspective on the relationship between cytokine abundance and health or infection status, we also plotted cytokine abundance against health status (**Supplementary Fig. 6a**) and infection stage (**Supplementary Fig. 6b**). We performed pairwise t-tests to determine whether the cytokine abundance at each state was significantly different from the mean cytokine abundance across the entire study population. Serum IL-22 levels were found to be significantly lower during early infection (p<0.01); however, this result was not significant at ɑ=0.01 following multiple testing correction.

Finally, we also sought to determine whether any of the three IL-17/IL-22 activity groups identified in the main text contained individuals reporting a disproportionate occurrence of one or more health state (**Supplementary Fig. 7**). A chi-squared test found no significant difference in the proportion of each visit type across groups (X-squared = 0.0010707, df = 1, p-value = 0.9739). This result indicated that any previously undetected effect of health status on serum cytokine levels was unlikely to have exerted a disproportionate effect on either IL-17/IL-22 active, or IL-17/IL-22 inactive individuals.

**Supplementary Figures**


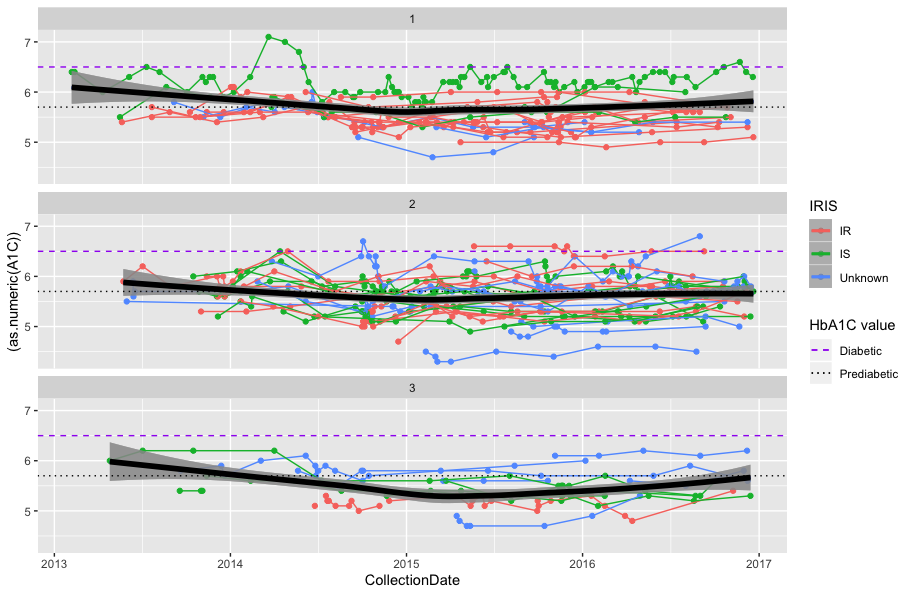


**Supplementary Figure 1: Longitudinal HbA1C measurements for iHMP study participants**Different panels represent individuals grouped by IL-17/IL-22 activity (1: Low Activity, 2: Indeterminate, 3: High Activity). Different colours represent insulin sensitivity determined by steady state plasma glucose concentrations (Insulin sensitive (IS) <150mg/dL, Insulin resistant (IR) ≥ 150mg/dL). Samples above the purple dashed line indicate HbA1C measurements in the diabetic range (>6.5%), samples between the purple and black dashed lines indicate HbA1C measurements in the prediabetic range (5.7% ≤ 6.5%). Data are shown for the 60 individuals that had >5 longitudinal cytokine + microbiome measurements and could be confidently classified as LA/IA/HA in mixture models (see methods).

**Supplementary Figure 2:** Overview of sample filtering steps applied before the different analyses reported in this study.

**Supplementary Figure 3: Generalized Mixture Model of individuals based on levels of IL-17 and IL-222
A)** Pairwise correlation of three cytokines mean value and SD. Color represents the group which the sample is assigned to
(blue: LA group, red: IA group, green: HA group). **B)** The Bayesian information criterion (BIC) result for the potential number of groups (components). The highest three BIC indicate the most likely number of groups.

**Supplementary Figure 4:** **Density distributions of cytokines for each group and the lower limit of detection.** Density distributions show the abundance of each cytokine within each group. Groups are marked with colors. Dashed lines represent the lower limits of detection (LLOD) for the Luminex assay used to calculate cytokine abundance. LLODs are calculated as 3 standard deviations above the mean absorbance for the negative control associated with each measurement. They can be interpreted as conservative thresholds below which the accuracy of measurements may become limited. (IL-17A: 64.4; IL-17F: 140.5, IL-22: 199.9)

**Supplementary Figure 5: Non-metric multidimensional scaling (nMDS) plots of study participants based on serum cytokine and gut microbiome compositions**

nMDS plots depicting variation between repeated measurements of A) microbiome and B) cytokine profiles. Repeated measurements from different individuals are colored separately to highlight the relationship between intra- and inter- individual variation. For clarity, only data for individuals with >15 repeated measurements are shown.

**Supplementary Figure 6: Longitudinal estimation of regression coefficients for relationship between IL-17/IL-22 and host health. A)** Correlation coefficients from model of cytokine abundance vs. health status. **B)** Correlation coefficients from model of cytokines vs infection stage.The X axis of all figures indicates the variables tested by liner mixed model, and Y axis shows the beta correlation coefficient probability.

**A**


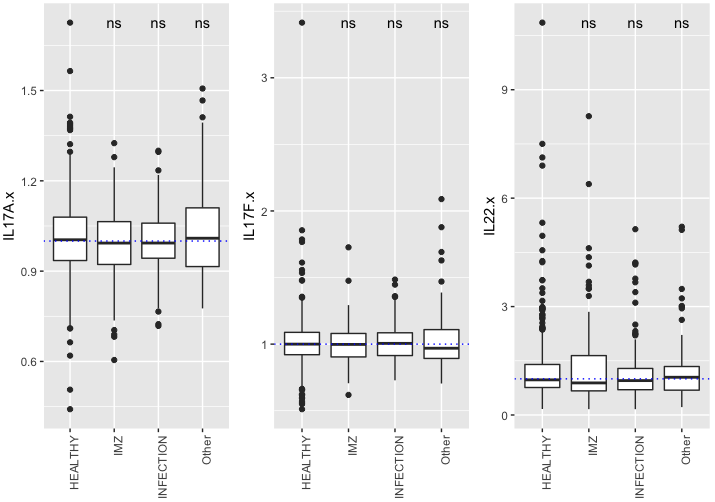


**B**


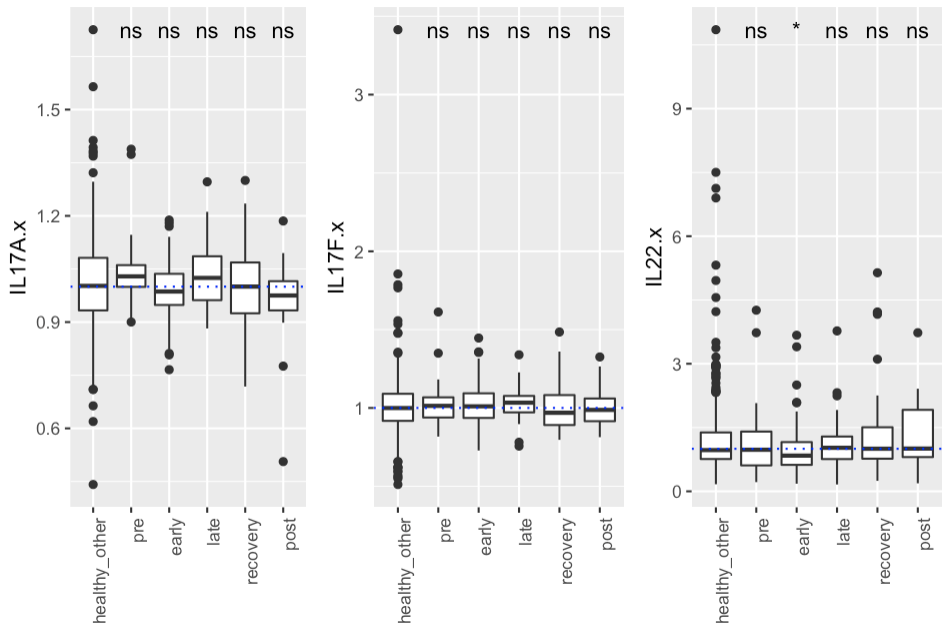


**Supplementary Figure 7: Boxplots showing abundance of cytokines across different host health categories. A)** Relationship between cytokine abundance and health status. **B)** Relationship between cytokine abundance and infection stage. Asterisks above each boxplot denote whether a condition was significantly different from healthy (p<0.01), based on two-tailed Student’s t test.


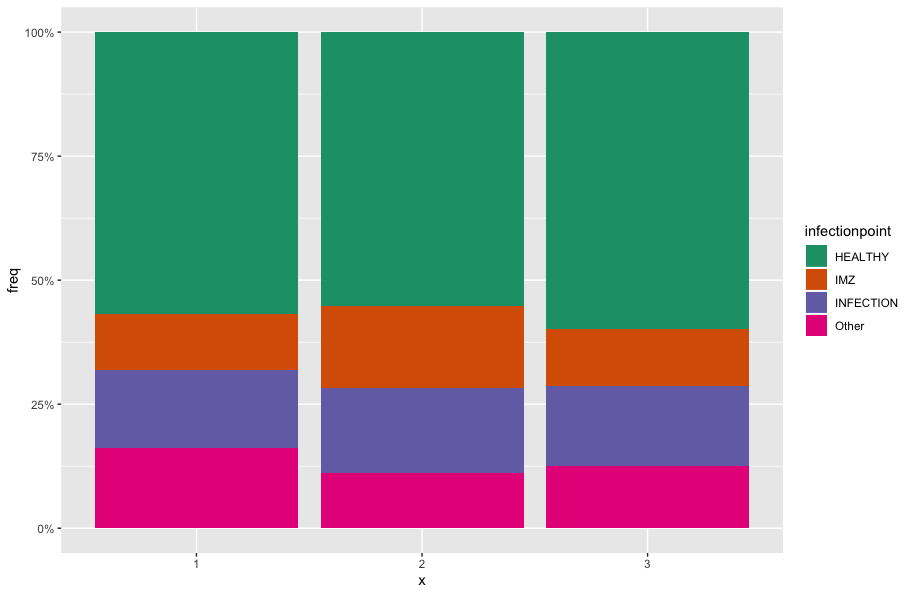
 **Supplementary Figure 8: Frequency visits classified as belonging to different health states in cytokine activity groups** Group 1 is IL-17/IL-22 inactive individuals (n=249 visits), Group 2 indeterminate (n=330 individuals), and Group 3 is IL-17/IL-22 active individuals (n=98 visits).

**Supplementary Figure 9: Age, BMI, and fasting plasma glucose levels of participants from different cytokine-related groups. A)** Percentage of insulin resistant individuals in each of the group, where insulin resistance is determined based on steady-state plasma glucose measurements (IR: SSPG ≥ 150mg/dl, IS: SSPG < 150mg/dl). The total number of individuals in each group is given at the top of each column. **B)** Comparisons of age (years), Body Mass Index (BMI, kg/m2), and Fasting Plasmid Glucose (FPG, mmoL/L) across groups. Pairwise t test was performed (* 0.01<P<0.05; ns: p>0.05). Group 1: Low Activity (LA), Group 2: Indeterminate Activity (IA), Group 3: High Activity (HA)

**Supplementary Figure 10: Longitudinal modelling of serum metabolism markers and blood cell volume shows higher metabolic disease risk in individuals from the IL-17/IL-22 inactive group.** Group is treated as a categorical variable, with x3 representing the HA group, and x2 representing the indeterminate group. Sex, age (adjusted for the period of their study involvement), BMI and number of days between project start to each sample collection (Days) are included in the model. Regression coefficients (beta) are plotted for each variable. Thick lines on each variable indicate 50% credible intervals (CI) or ± 1 SD, thin lines indicate 95% CI or ± 2SD. This analysis is based on 88, 285, and 229 repeated measurements for HA, IA, and LA individuals, respectively.

**Supplementary Figure 11: Longitudinal modelling of Shannon diversity shows higher diversity in individuals from the IL-17/IL-22 active group.** Sex, age and BMI are included to build a model for the relationship between LA, IA and HA groups and their gut microbiome Shannon diversity. Regression estimates are plotted with thick lines for each variable indicate 50% Credible intervals or ± 1 SD of the correlation coefficient, thin lines for 95% CI or ± 2SD. This analysis is based on 94, 285, and 243 measurements for HA, IA, and LA individuals, respectively.

**Supplementary Figure 12: Longitudinal modelling of Firmicutes to Bacteroidetes ratio shows a higher F:B ratio in individuals from the IL-17/IL-22 active group.** Sex, age and BMI are included to build a model for the relationship between LA, IA and HA group and Firmicutes to Bacteroidetes ratio. Regression estimates are plotted with thick lines for each variable indicate 50% Credible intervals or ± 1 SD of the correlation coefficient, thin lines for 95% CI or ± 2SD. This analysis is based on 94, 285, and 243 measurements for HA, IA, and LA individuals, respectively.

**Supplementary Figure 13: Principal components analysis of diet preferences.** Principal components analysis of diet preferences presented in **Supplementary Table 1**. **A**) Data are shown for the 7 individuals with 10 or more dietary assessments across the study period with values coloured and grouped by individual. **B**) Data are shown for all individuals who could be successfully classified into HA, IA and LA groups on the basis of IL-17/IL-22 activity.

**Supplementary Table 2:** Characteristics for **A**) the cohort of 60 iHMP study participants with ≥5 cytokine measurements who could be confidently classified as HA/IA/LA, and **B**) the 40 participants within this cohort who also had SSPG measurements.
